# Supplementary material
Source: PubMed Central journal article supplement (PMC4939281)
Supplement: NIHMS796691-supplement-supplement_1.pdf [file NIHMS796691-supplement-supplement_1.pdf]

## Appendix A

## Supplemental Table A1

Values used in the Principle Components Analysis to examine links between fish Hg content and benthivory.

| Taxa            | Benthivory index <sup>a</sup> | Trophic position  | Hg (mean, fillet, $\mu\text{g}^{-1}$ w.w.) <sup>b</sup> | Length (cm, fillet samples) <sup>b</sup> |
|-----------------|-------------------------------|-------------------|---------------------------------------------------------|------------------------------------------|
| Pumpkinseed     | 99                            | 3.3 <sup>c</sup>  | 0.484                                                   | 17.9                                     |
| Yellow perch    | 77                            | 3.69 <sup>c</sup> | 0.441                                                   | 20.1                                     |
| Rock bass       | 91                            | 3.74 <sup>c</sup> | 0.61                                                    | 19.5                                     |
| Smallmouth bass | 77                            | 4.02 <sup>c</sup> | 0.589                                                   | 32.1                                     |
| Largemouth bass | 65                            | 4.12 <sup>c</sup> | 0.535                                                   | 35.8                                     |
| Northern pike   | 61                            | 4.31 <sup>c</sup> | 0.645                                                   | 61.6                                     |
| Walleye         | 58                            | 4.33 <sup>c</sup> | 0.759                                                   | 44.6                                     |
| Rainbow smelt   | 32                            | 3.36 <sup>d</sup> | 0.292                                                   | 18.8                                     |
| Whitefishes     | 88                            | 3.07 <sup>d</sup> | 0.209                                                   | 39.3                                     |
| Lake trout      | 53                            | 3.89 <sup>d</sup> | 0.606                                                   | 56.8                                     |
| Longnose sucker | 100                           | 3 <sup>e</sup>    | 0.187                                                   | 32                                       |
| White sucker    | 100                           | 3 <sup>e</sup>    | 0.186                                                   | 37.1                                     |
| Bluegill        | 100                           | 3 <sup>e</sup>    | 0.166                                                   | 17.2                                     |
| Brown bullhead  | 100                           | 3 <sup>e</sup>    | 0.172                                                   | 26.2                                     |

<sup>a</sup> VanderZanden and Vadeboncoeur (2002).

<sup>b</sup> Kamman et al. (2005).

<sup>c</sup> VanderZanden et al. (1997), Table 3, "Dietary" TP.

<sup>d</sup> VanderZanden and Rasmussen (1996), Table 3, "Class 2" food web, "Dietary" TP.

<sup>e</sup> Approximated; see Materials and methods for details.

## References

- Back, R.C., Gorski, P.R., Cleckner, L.B., Hurley, J.P., 2003. Mercury content and speciation in the plankton and benthos of Lake Superior. *Sci. Total Environ.* 304, 349–354.
- Back, R.C., Watras, C.J., 1995. Mercury in zooplankton of Northern Wisconsin lakes - taxonomic and site-specific trends. *Water Air Soil Pollut.* 80, 931–938.
- Balcom, P.H., Schartup, A.T., Mason, R.P., Chen, C.Y., 2015. Sources of water column methylmercury across multiple estuaries in the Northeast U.S. *Mar. Chem.* 177, 721–730.
- Baumann, P.C., Kitchell, J.F., 1974. Diel patterns of distribution and feeding of bluegill (*Lepomis macrochirus*) in Lake Wingra, Wisconsin. *Trans. Am. Fish. Soc.* 103, 255–260.
- Becker, D.S., Bigham, G.N., 1995. Distribution of mercury in the aquatic food web of Onondaga Lake, New York. *Water Air Soil Pollut.* 80, 563–571.
- Berg, K., Ockelmann, K.W., 1959. The respiration of freshwater snails. *J. Exp. Biol.* 36, 690–708.
- Cabana, G., Tremblay, A., Kalff, J., Rasmussen, J.B., 1994. Pelagic food chain structure in Ontario lakes - a determinant of mercury levels in lake trout (*Salvelinus namaycush*). *Can. J. Fish. Aquat. Sci.* 51, 381–389.
- Chen, C.Y., Borsuk, M.E., Bugge, D.M., Hollweg, T., Balcom, P.H., Ward, D.M., et al., 2014. Benthic and pelagic pathways of methylmercury bioaccumulation in estuarine food webs of the northeast United States. *PLoS One* 9.
- Chen, C.Y., Dionne, M., Mayes, B.M., Ward, D.M., Sturup, S., Jackson, B.P., 2009. Mercury bioavailability and bioaccumulation in estuarine food webs in the Gulf of Maine. *Environ. Sci. Technol.* 43, 1804–1810.
- Chen, C.Y., Folt, C.L., 2005a. High plankton densities reduce mercury biomagnification. *Environ. Sci. Technol.* 39, 115–121.
- Chen, C.Y., Stemberger, R.S., Kamman, N.C., Mayes, B.M., Folt, C.L., 2005b. Patterns of Hg bioaccumulation and transfer in aquatic food webs across multi-lake studies in the northeast US. *Ecotoxicology* 14, 135–147.
- Chen, C.Y., Stemberger, R.S., Klauze, B., Blum, J.D., Pickhardt, P.C., Folt, C.L., 2000. Accumulation of heavy metals in food web components across a gradient of lakes. *Limnol. Oceanogr.* 45, 1525–1536.
- Chetelat, J., Amyot, M., Garcia, E., 2011. Habitat-specific bioaccumulation of methylmercury in invertebrates of small mid-latitude lakes in North America. *Environ. Pollut.* 159, 10–17.
- Chumchal, M.M., Drenner, R.W., Fry, B., Hambright, K.D., Newland, L.W., 2008. Habitat-specific differences in mercury concentration in a top predator from a shallow lake. *Trans. Am. Fish. Soc.* 137, 195–208.
- Clarke, J.U., 1998. Evaluation of censored data methods to allow statistical comparisons among very small samples with below detection limit observations. *Environ. Sci. Technol.* 32, 177–183.
- Cleckner, L.B., Gilmour, C.C., Hurley, J.P., Krabbenhoft, D.P., 1999. Mercury methylation in periphyton of the Florida Everglades. *Limnol. Oceanogr.* 44, 1815–1825.
- Copeman, L.A., Parrish, C.C., Brown, J.A., Harel, M., 2002. Effects of docosahexaenoic, eicosapentaenoic, and arachidonic acids on the early growth, survival, lipid composition and pigmentation of yellowtail flounder (*Limanda ferruginea*): a live food enrichment experiment. *Aquaculture* 210, 285–304.
- Cremona, F., Planas, D., Lucotte, M., 2008. Assessing the importance of macroinvertebrate trophic dead ends in the lower transfer of methylmercury in littoral food webs. *Can. J. Fish. Aquat. Sci.* 65, 2043–2052.
- Cummins, K.W., Wuycheck, J.C., 1971. Caloric equivalents for investigations in ecological energetics. *Mitt. Internat. Verein. Limnol.* 18, 1–151.
- Dionne, M., 1991. How littoral macrophyte growth form influences foraging ecology of pumpkinseed fish. *Biology*. Dartmouth College, Hanover, p. 141.
- Dionne, M., Folt, C.L., 1991. An experimental analysis of macrophyte growth forms as fish foraging habitat. *Can. J. Fish. Aquat. Sci.* 48, 123–131.
- Driscoll, C.T., Han, Y.J., Chen, C.Y., Evers, D.C., Lambert, K.F., Holsen, T.M., et al., 2007. Mercury contamination in forest and freshwater ecosystems in the Northeastern United States. *Bioscience* 57, 17–28.
- Dumont, H.J., Vandeveld, I., Dumont, S., 1975. Dry weight estimate of biomass in a selection of cladocera, copepoda and rotifera from plankton, periphyton and benthos of continental waters. *Oecologia* 19, 75–97.
- Eagles-Smith, C.A., Suchanek, T.H., Colwell, A.E., Anderson, N.L., 2008a. Mercury trophic transfer in a eutrophic lake: the importance of habitat-specific foraging. *Ecol. Appl.* 18, A196–A212.
- Eagles-Smith, C.A., Suchanek, T.H., Colwell, A.E., Anderson, N.L., Moyle, P.B., 2008b. Changes in fish diets and food web mercury bioaccumulation induced by an invasive planktivorous fish. *Ecol. Appl.* 18, A213–A226.
- Elser, J.J., Dobberfuhl, D.R., MacKay, N.A., Schampel, J.H., 1996. Organism size, life history, and N:P stoichiometry. *Bioscience* 46, 674–684.
- Essington, T.E., Houser, J.N., 2003. The effect of whole-lake nutrient enrichment on mercury concentration in age-1 yellow perch. *Trans. Am. Fish. Soc.* 132, 57–68.
- Fisheries and Agriculture Organization of the United Nations (FAO). The State of the World Fisheries and Aquaculture. United Nations, Rome, 2014.
- Folt, C.L., Chen, C.Y., Pickhardt, P.C., 2002. Using plankton food web variables as indicators for the accumulation of toxic metals in fish. In: Was, S.H. Wilson (Ed.), *Biomarkers of Environmentally Associated Disease: Technologies, Concepts, and Perspectives*. CRC Press/Lewis Publishers.
- Frost, P.C., Tank, S.E., Turner, M.A., Elser, J.J., 2003. Elemental composition of littoral invertebrates from oligotrophic and eutrophic Canadian lakes. *J. N. Am. Benthol. Soc.* 22, 51–62.
- Glazier, D.S., 2005. Beyond the '3/4-power law': variation in the intra- and interspecific scaling of metabolic rate in animals. *Biol. Rev.* 80, 611–662.
- Glazier, D.S., 2006. The 3/4-power law is not universal: evolution of isometric, ontogenetic metabolic scaling in pelagic animals. *Bioscience* 56, 325–332.
- Gorski, P.R., Cleckner, L.B., Hurley, J.P., Sierszen, M.E., Armstrong, D.E., 2003. Factors affecting enhanced mercury bioaccumulation in inland lakes of Isle Royale National Park, USA. *Sci. Total Environ.* 304, 327–348.
- Hall, B.D., Bodaly, R.A., Fudge, R.J.P., Rudd, J.W.M., Rosenberg, D.M., 1997. Food as the dominant pathway of methylmercury uptake by fish. *Water Air Soil Pollut.* 100, 13–24.
- Hamburger, K., Dall, P.C., 1990. The respiration of common benthic invertebrate species from the shallow littoral zone of Lake Esrom, Denmark. *Hydrobiologia* 199, 117–130.
- Haney, J.F., 1973. In situ examination of grazing activities of natural zooplankton communities. *Archiv Fur Hydrobiologie* 72, 87–132.
- Hanson, P.C., Johnson, T.B., Schindler, D.E., Kitchell, J.F., 1997. Fish Bioenergetics 3.0. University of Wisconsin Sea Grant Institute, Madison, Technical Report WISCU-T-9-7-001.
- Hare, L., Campbell, P.G.C., 1992. Temporal variations of trace metals in aquatic insects. *Freshw. Biol.* 27, 13–27.
- Harris, R.C., Bodaly, R.A., 1998. Temperature, growth and dietary effects on fish mercury dynamics in two Ontario lakes. *Biogeochemistry* 40, 175–187.
- Herrin, R.T., Lathrop, R.C., Gorski, P.R., Andren, A.W., 1998. Hypolimnetic methylmercury and its uptake by plankton during fall destratification: a key entry point of mercury into lake food chains? *Limnol. Oceanogr.* 43, 1476–1486.
- Hodgson, J.R., H., Xi, Kitchell, J.F., Kitchell, J.F., 1993. The fish populations. In: Carpenter, S.R. (Ed.), *The trophic cascade in lakes*. Cambridge University Press, Cambridge, UK, pp. 43–68.
- Institute of Medicine, 2006. In: Nesheim, M.C., Yaktine, A.L. (Eds.), *Seafood Choices: Balancing Benefits and Risks*. Institute of Medicine of the National Academies, Washington D.C., p. 608.
- Kainz, M., Lucotte, M., Parrish, C.C., 2002. Methyl mercury in zooplankton - the role of size, habitat, and food quality. *Can. J. Fish. Aquat. Sci.* 59, 1606–1615.
- Kainz, M., Telmer, K., Mazumder, A., 2006. Bioaccumulation patterns of methyl mercury and essential fatty acids in lacustrine planktonic food webs and fish. *Sci. Total Environ.* 368, 271–282.
- Kamman, N.C., Burgess, N.M., Driscoll, C.T., Simonin, H.A., Goodale, W., Linehan, J., et al., 2005. Mercury in freshwater fish of northeast North America - a geographic perspective based on fish tissue monitoring databases. *Ecotoxicology* 14, 163–180.
- Karimi, R., Chen, C.Y., Pickhardt, P.C., Fisher, N.S., Folt, C.L., 2007. Stoichiometric controls of mercury dilution by growth. *Proc. Natl. Acad. Sci. U. S. A.* 104, 7477–7482.
- Karimi, R., Fisher, N.S., Folt, C.L., 2010. Multielement stoichiometry in aquatic invertebrates: when growth dilution matters. *Am. Nat.* 176, 699–709.
- Karimi, R., Fitzgerald, T.P., Fisher, N.S., 2012. A quantitative synthesis of mercury in commercial seafood and implications for exposure in the United States. *Environ. Health Perspect.* 120, 1512–1519.
- Karimi, R., Folt, C.L., 2006. Beyond macronutrients: element variability and multi-element stoichiometry in freshwater invertebrates. *Ecol. Lett.* 9, 1–11.
- Karimi, R., Frisk, M., Fisher, N.S., 2013. Contrasting food web factor and body size relationships with Hg and Se concentrations in marine biota. *PLoS One* 9, e74695.
- Keast, A., Welsh, L., 1968. Daily feeding periodicities food uptake rates and dietary changes with hour of day in some lake fishes. *J. Fish. Res. Board Can.* 25, 1133–1144.
- Kidd, K.A., Bootsma, H.A., Hesslein, R.H., Lockhart, W.L., Hecky, R.E., 2003. Mercury concentrations in the food web of Lake Malawi, East Africa. *J. Great Lakes Res.* 29, 258–266.
